# Supplementary material
Source: publisher figshare collection journal article supplement (https://sage.figshare.com/ndownloader/files/21891459)
Supplement: Supplementary file 1 [file 21891459]

## Sheet: Sheet1
	VC	Str	SSVC	Ac.G	Dist	Over	Clean	Solo	Strat	Tele	LP	SG	H.Bod	D.Mach	Fade	Scr.	Keys	Marsh	T332	Orch	T.miss	Color	Light	Alt	Mono	Dim	2char	Cart	Digi	Spd	Reflx	ExNo	Long	DTRK	Zoom	Multi	Shak	Super	Mirr	8mm	Make	Cross	TopL	Bowl	Spiky	Bald	Butch	Pixie	Crop
VC	258	0	42	54	84	155	82	114	38	18	39	13	48	54	48	20	52	29	20	31	35	132	163	99	108	139	8	10	28	175	18	56	22	169	152	35	154	111	15	58	33	12	78	35	66	73	18	39	65
Str	0	29	0	5	3	11	9	12	2	0	2	1	4	18	5	3	17	1	3	3	2	11	13	13	10	15	0	0	4	17	1	4	1	20	15	7	10	11	1	6	5	4	11	3	6	7	0	3	3
SSVC	42	0	42	4	5	12	11	10	4	0	3	0	3	25	9	2	24	4	2	8	8	21	26	16	20	22	1	1	1	27	1	12	7	26	24	2	28	24	1	8	5	1	10	0	6	15	6	11	13
Ac.G	54	5	4	60	7	40	27	30	7	6	2	3	16	7	13	3	6	4	8	7	14	29	37	23	21	34	1	2	6	34	4	10	6	49	37	11	27	25	3	15	7	4	14	11	14	13	3	8	8
Dist	84	3	5	7	87	42	16	47	19	7	15	6	17	7	7	14	3	11	4	3	5	51	65	43	41	54	1	8	12	63	3	21	2	53	51	11	57	43	7	24	17	4	31	13	31	22	4	4	19
Over	155	11	12	40	42	167	58	88	32	13	34	9	40	23	32	12	20	22	15	18	26	83	96	62	70	83	4	5	18	113	15	35	13	110	96	28	96	70	10	38	19	12	50	26	42	41	8	21	32
Clean	82	9	11	27	16	58	91	34	13	10	11	6	23	19	20	4	15	10	6	12	13	50	54	35	38	38	3	4	7	61	7	13	9	68	55	20	54	35	4	22	11	9	23	15	19	23	4	11	20
Solo	114	12	10	30	47	88	34	126	22	11	20	8	31	13	21	7	16	23	6	11	14	58	75	49	63	65	2	4	10	83	13	26	11	81	73	22	72	56	8	30	19	7	40	20	27	33	5	18	26
Strat	38	2	4	7	19	32	13	22	40	5	4	3	5	2	9	4	1	9	2	1	6	16	23	18	18	20	1	2	4	30	2	8	1	22	27	7	25	22	3	3	2	1	13	7	10	8	3	3	8
Tele	18	0	0	6	7	13	10	11	5	18	4	1	2	0	4	1	1	4	2	3	0	10	12	6	7	13	0	1	1	12	3	3	0	10	12	3	14	9	1	5	2	0	3	1	5	0	1	3	5
LP	39	2	3	2	15	34	11	20	4	4	41	1	3	3	8	1	0	12	4	4	4	20	28	13	19	24	1	1	3	29	3	9	1	25	27	4	23	18	3	18	7	3	13	6	13	9	2	8	8
SG	13	1	0	3	6	9	6	8	3	1	1	14	6	0	1	2	0	4	0	0	1	6	6	6	6	4	0	0	1	13	0	4	3	12	7	3	9	6	0	5	1	1	2	4	4	2	0	1	2
H.Bod	48	4	3	16	17	40	23	31	5	2	3	6	52	4	8	3	8	7	4	5	12	29	29	16	24	23	3	1	4	30	8	11	5	36	31	11	30	25	1	12	9	3	8	16	12	11	1	6	6
D.Mach	54	18	25	7	7	23	19	13	2	0	3	0	4	73	20	4	52	3	5	12	13	37	49	31	25	39	3	1	12	51	1	14	7	46	41	10	37	31	6	16	11	3	27	4	16	26	7	16	24
Fade	48	5	9	13	7	32	20	21	9	4	8	1	8	20	53	2	19	5	9	10	11	27	34	25	17	26	0	2	8	38	2	10	2	37	30	8	27	29	1	7	5	1	15	7	6	15	5	10	15
Scr.	20	3	2	3	14	12	4	7	4	1	1	2	3	4	2	23	3	1	1	1	3	14	17	9	10	15	1	1	4	20	2	6	1	16	15	1	15	7	2	7	5	2	15	3	8	10	2	1	4
Keys	52	17	24	6	3	20	15	16	1	1	0	0	8	52	19	3	70	2	4	12	12	36	38	24	22	38	2	1	10	43	3	16	6	43	37	9	32	34	2	12	8	2	23	6	13	22	7	17	24
Marsh	29	1	4	4	11	22	10	23	9	4	12	4	7	3	5	1	2	30	1	1	2	8	18	12	11	18	0	0	1	23	1	11	4	22	18	6	18	16	1	4	3	2	7	5	5	6	1	4	5
T332	20	3	2	8	4	15	6	6	2	2	4	0	4	5	9	1	4	1	23	2	6	10	16	6	8	13	0	0	1	14	0	1	1	18	14	0	10	10	0	2	2	2	10	3	3	5	1	4	5
Orch	31	3	8	7	3	18	12	11	1	3	4	0	5	12	10	1	12	1	2	34	5	14	22	13	16	18	1	0	3	19	4	7	4	24	19	5	13	12	1	6	5	0	8	4	9	8	4	7	7
T.miss	35	2	8	14	5	26	13	14	6	0	4	1	12	13	11	3	12	2	6	5	37	17	25	11	13	16	1	2	3	23	2	8	6	22	21	1	19	15	3	5	5	3	10	6	6	11	2	2	7
Color	132	11	21	29	51	83	50	58	16	10	20	6	29	37	27	14	36	8	10	14	17	144	101	72	58	82	5	6	16	109	9	30	8	100	81	22	86	72	10	40	21	9	49	19	37	45	10	17	31
Light	163	13	26	37	65	96	54	75	23	12	28	6	29	49	34	17	38	18	16	22	25	101	177	77	75	123	4	2	24	124	8	34	10	117	107	21	104	77	14	39	28	8	59	22	44	52	10	23	41
Alt	99	13	16	23	43	62	35	49	18	6	13	6	16	31	25	9	24	12	6	13	11	72	77	113	50	66	3	4	17	89	6	21	4	71	71	27	79	61	10	33	15	5	40	19	26	35	10	15	31
Mono	108	10	20	21	41	70	38	63	18	7	19	6	24	25	17	10	22	11	8	16	13	58	75	50	119	64	3	5	14	77	11	25	8	72	71	20	84	56	6	38	15	5	46	15	32	32	8	16	21
Dim	139	15	22	34	54	83	38	65	20	13	24	4	23	39	26	15	38	18	13	18	16	82	123	66	64	155	4	3	22	107	7	33	9	109	94	21	81	69	8	29	23	3	53	16	36	47	9	21	34
2char	8	0	1	1	1	4	3	2	1	0	1	0	3	3	0	1	2	0	0	1	1	5	4	3	3	4	8	0	1	7	2	2	1	7	4	4	5	4	1	1	2	1	6	3	2	3	1	2	5
Cart	10	0	1	2	8	5	4	4	2	1	1	0	1	1	2	1	1	0	0	0	2	6	2	4	5	3	0	10	0	6	2	3	0	5	7	2	6	4	1	3	1	1	3	0	3	2	2	1	4
Digi	28	4	1	6	12	18	7	10	4	1	3	1	4	12	8	4	10	1	1	3	3	16	24	17	14	22	1	0	33	29	2	7	0	18	19	5	15	19	4	6	2	2	13	6	15	12	3	6	9
Spd	175	17	27	34	63	113	61	83	30	12	29	13	30	51	38	20	43	23	14	19	23	109	124	89	77	107	7	6	29	193	11	37	9	129	121	35	123	90	15	46	29	12	72	25	49	61	14	29	48
Reflx	18	1	1	4	3	15	7	13	2	3	3	0	8	1	2	2	3	1	0	4	2	9	8	6	11	7	2	2	2	11	19	6	6	11	15	4	13	5	1	6	2	0	3	3	8	5	1	4	3
ExNo	56	4	12	10	21	35	13	26	8	3	9	4	11	14	10	6	16	11	1	7	8	30	34	21	25	33	2	3	7	37	6	60	8	42	36	4	39	27	2	19	8	8	18	7	20	21	8	9	15
Long	22	1	7	6	2	13	9	11	1	0	1	3	5	7	2	1	6	4	1	4	6	8	10	4	8	9	1	0	0	9	6	8	23	17	6	2	13	3	0	5	2	0	4	1	2	8	0	4	4
DTRK	169	20	26	49	53	110	68	81	22	10	25	12	36	46	37	16	43	22	18	24	22	100	117	71	72	109	7	5	18	129	11	42	17	190	102	31	107	80	10	44	28	13	60	28	50	61	10	28	45
Zoom	152	15	24	37	51	96	55	73	27	12	27	7	31	41	30	15	37	18	14	19	21	81	107	71	71	94	4	7	19	121	15	36	6	102	168	26	107	73	10	41	21	7	46	23	41	38	11	24	36
Multi	35	7	2	11	11	28	20	22	7	3	4	3	11	10	8	1	9	6	0	5	1	22	21	27	20	21	4	2	5	35	4	4	2	31	26	42	30	16	4	16	4	2	14	11	7	16	3	5	11
Shak	154	10	28	27	57	96	54	72	25	14	23	9	30	37	27	15	32	18	10	13	19	86	104	79	84	81	5	6	15	123	13	39	13	107	107	30	165	79	13	50	21	10	59	22	41	46	10	19	38
Super	111	11	24	25	43	70	35	56	22	9	18	6	25	31	29	7	34	16	10	12	15	72	77	61	56	69	4	4	19	90	5	27	3	80	73	16	79	123	14	35	14	5	40	14	26	30	9	12	30
Mirr	15	1	1	3	7	10	4	8	3	1	3	0	1	6	1	2	2	1	0	1	3	10	14	10	6	8	1	1	4	15	1	2	0	10	10	4	13	14	17	7	2	1	7	2	5	4	0	0	6
8mm	58	6	8	15	24	38	22	30	3	5	18	5	12	16	7	7	12	4	2	6	5	40	39	33	38	29	1	3	6	46	6	19	5	44	41	16	50	35	7	65	10	4	20	11	21	19	3	7	14
Make	33	5	5	7	17	19	11	19	2	2	7	1	9	11	5	5	8	3	2	5	5	21	28	15	15	23	2	1	2	29	2	8	2	28	21	4	21	14	2	10	38	7	20	2	17	13	1	6	10
Cross	12	4	1	4	4	12	9	7	1	0	3	1	3	3	1	2	2	2	2	0	3	9	8	5	5	3	1	1	2	12	0	8	0	13	7	2	10	5	1	4	7	16	8	1	8	6	3	5	4
TopL	78	11	10	14	31	50	23	40	13	3	13	2	8	27	15	15	23	7	10	8	10	49	59	40	46	53	6	3	13	72	3	18	4	60	46	14	59	40	7	20	20	8	90	7	24	43	5	13	26
Bowl	35	3	0	11	13	26	15	20	7	1	6	4	16	4	7	3	6	5	3	4	6	19	22	19	15	16	3	0	6	25	3	7	1	28	23	11	22	14	2	11	2	1	7	38	8	4	0	2	8
Spiky	66	6	6	14	31	42	19	27	10	5	13	4	12	16	6	8	13	5	3	9	6	37	44	26	32	36	2	3	15	49	8	20	2	50	41	7	41	26	5	21	17	8	24	8	73	25	3	13	21
Bald	73	7	15	13	22	41	23	33	8	0	9	2	11	26	15	10	22	6	5	8	11	45	52	35	32	47	3	2	12	61	5	21	8	61	38	16	46	30	4	19	13	6	43	4	25	81	9	19	32
Butch	18	0	6	3	4	8	4	5	3	1	2	0	1	7	5	2	7	1	1	4	2	10	10	10	8	9	1	2	3	14	1	8	0	10	11	3	10	9	0	3	1	3	5	0	3	9	18	13	8
Pixie	39	3	11	8	4	21	11	18	3	3	8	1	6	16	10	1	17	4	4	7	2	17	23	15	16	21	2	1	6	29	4	9	4	28	24	5	19	12	0	7	6	5	13	2	13	19	13	42	21
Crop	65	3	13	8	19	32	20	26	8	5	8	2	6	24	15	4	24	5	5	7	7	31	41	31	21	34	5	4	9	48	3	15	4	45	36	11	38	30	6	14	10	4	26	8	21	32	8	21	68
Tank	74	7	17	12	23	43	28	33	6	3	11	3	5	30	18	7	25	7	5	7	10	43	53	37	27	44	2	2	12	65	2	23	4	59	45	12	46	34	5	15	14	7	30	9	27	35	9	23	46
Lace	16	0	4	3	3	8	6	8	2	1	3	0	4	3	6	2	4	1	2	1	2	10	10	9	5	12	1	0	0	9	0	4	0	12	8	2	8	9	0	4	2	1	4	1	1	5	1	4	7
Leath	108	13	23	23	34	72	33	66	15	8	23	5	20	30	20	7	24	22	6	13	15	61	79	45	54	68	3	1	9	87	7	29	9	81	69	19	71	57	8	29	23	7	43	13	28	39	9	27	39
Flan	40	6	10	9	14	24	12	19	11	3	7	4	6	11	4	4	10	5	2	6	0	21	26	19	22	21	1	0	3	31	1	10	3	29	33	7	35	20	1	12	4	2	16	9	11	12	4	8	12
Torn	22	1	2	1	11	14	3	11	0	2	6	0	6	5	2	3	5	6	3	2	2	8	15	8	13	11	0	0	1	14	1	8	0	12	10	1	15	10	1	3	5	1	11	2	7	7	3	5	8
Dark	219	21	39	47	72	136	76	111	33	16	33	11	44	63	46	18	59	26	15	29	30	123	154	95	101	133	8	5	22	161	16	51	21	160	137	36	138	103	11	56	31	10	76	31	65	73	15	37	56
Baggy	60	8	17	9	14	33	19	19	8	3	6	1	7	29	16	5	24	7	5	12	10	34	36	29	25	35	1	1	7	53	4	18	6	44	39	9	42	24	2	10	8	3	24	4	22	26	10	16	27
Nice	235	23	38	56	82	155	83	118	39	17	37	14	46	59	46	20	57	28	19	29	28	130	159	104	105	140	8	9	26	173	17	59	22	177	153	38	147	111	13	60	34	15	79	36	69	74	17	36	63
LA	88	10	19	17	32	57	25	45	14	3	18	5	19	28	22	9	25	12	6	13	18	51	61	38	43	47	1	4	12	70	3	27	5	66	55	15	60	42	9	23	19	6	27	14	30	20	5	15	30
Cow	17	1	3	5	8	13	4	10	4	2	3	0	3	2	1	3	2	1	0	2	4	9	12	8	9	6	0	1	0	11	1	7	1	10	13	2	13	4	1	5	3	2	6	2	4	5	0	3	6
Nerd	17	2	4	3	7	9	7	9	3	0	2	1	3	7	1	2	6	1	2	4	2	10	11	7	7	9	3	1	1	15	0	7	3	11	14	4	10	3	0	5	3	3	4	6	3	4	1	3	4
Nat	107	13	16	28	33	72	44	53	19	7	10	5	24	31	25	6	34	10	7	13	14	67	70	50	52	54	4	4	16	83	7	24	9	83	63	17	79	66	9	28	16	4	45	14	28	31	7	15	28
Urban	108	11	15	26	29	72	42	59	10	7	17	5	25	26	18	5	25	15	7	14	19	55	59	46	57	62	5	4	6	77	6	32	12	90	70	20	75	50	5	32	12	9	38	18	28	40	8	17	31
Water	85	10	17	21	27	59	32	42	12	6	14	4	14	26	16	3	28	7	9	8	9	48	51	41	36	49	4	5	10	72	4	14	3	66	51	15	55	51	6	24	17	5	39	12	28	24	8	16	25
Indus	32	1	2	5	15	20	8	17	6	2	7	1	7	6	5	3	3	3	3	2	3	19	25	11	13	21	0	1	5	26	3	6	2	22	24	3	21	11	1	5	8	3	9	4	14	13	0	3	2
Car	80	6	14	20	24	44	29	43	6	6	10	5	16	23	16	3	19	13	2	7	9	42	46	37	35	48	3	4	8	64	4	19	7	75	50	14	61	46	8	28	9	5	27	12	20	33	5	11	26
NoBand	25	12	5	11	9	21	16	12	0	2	0	0	2	14	8	1	11	0	6	6	3	18	19	14	14	18	1	1	7	24	0	6	6	28	17	6	22	19	2	7	6	4	12	3	6	13	1	3	8
Dream	8	3	0	1	3	7	5	5	1	0	0	1	3	4	1	1	5	0	1	2	2	6	4	4	3	3	2	0	2	6	0	2	0	10	4	2	5	4	1	1	3	2	6	3	3	2	1	1	3
Dance	72	14	27	11	12	41	23	31	8	0	9	2	13	44	22	4	40	4	6	16	14	40	55	36	31	41	5	2	11	60	5	24	6	55	53	15	45	37	9	16	14	6	28	11	20	29	7	20	40
Silly	195	23	32	46	60	134	73	94	34	12	36	13	43	53	43	15	53	27	17	28	27	100	125	84	84	106	7	7	28	143	16	51	17	136	135	32	124	92	13	49	29	16	57	28	60	53	14	35	60
Srs	60	6	10	12	25	34	19	28	4	5	6	2	10	20	7	8	17	3	7	4	8	41	47	26	32	45	1	3	4	50	3	8	5	52	30	10	42	32	3	17	12	1	33	8	11	28	5	9	9
Agg	31	1	4	7	20	19	5	16	9	5	5	1	3	4	4	11	2	6	1	3	2	22	23	15	13	19	0	2	5	26	0	7	1	20	16	4	21	14	2	8	6	1	17	5	10	12	2	2	8
Alc	33	5	6	10	8	18	14	19	3	1	5	3	8	12	7	3	10	3	4	7	4	20	25	15	14	21	2	1	1	24	4	9	3	29	24	6	16	14	3	9	4	0	7	6	5	13	2	9	14
Relig	37	3	6	6	12	26	12	19	7	2	6	2	8	8	12	4	13	3	5	1	4	25	24	14	19	18	2	3	5	30	2	9	0	32	19	4	24	22	2	11	6	3	22	3	11	14	2	6	10
Cap	49	7	9	9	17	32	22	26	6	3	3	3	8	15	9	5	11	6	2	6	2	27	31	23	22	28	2	2	4	41	2	17	3	46	31	9	36	27	5	13	5	5	17	11	12	21	5	6	13
Circ	11	0	1	2	4	8	3	5	1	0	2	0	3	3	0	1	2	0	1	1	3	5	9	3	7	6	2	0	2	7	1	3	1	8	5	1	7	6	1	3	3	3	8	0	6	8	0	2	4
Pol	30	4	5	5	8	20	11	12	1	2	6	0	8	8	4	2	7	4	1	1	4	17	16	11	15	19	3	0	1	26	4	10	4	28	18	9	25	12	2	10	6	2	14	5	8	15	3	5	11
Finst	32	1	4	8	12	19	10	20	7	3	5	4	6	5	6	6	5	3	0	6	7	20	20	14	17	15	1	3	3	21	4	8	3	22	21	5	20	8	2	8	5	2	7	5	8	5	6	7	9
2Col	85	9	27	13	14	44	28	27	11	4	9	2	11	45	21	7	38	9	5	19	14	41	56	38	39	49	5	2	10	66	5	28	8	72	48	17	58	35	8	18	12	7	42	6	28	47	11	24	42
Wfem	40	1	5	13	10	25	19	18	3	4	5	3	6	7	11	4	12	3	4	4	5	27	28	15	18	19	1	2	3	27	5	5	4	28	24	6	22	18	0	9	2	3	8	4	7	4	4	10	11
Bfem	18	1	13	2	1	3	5	1	2	0	0	0	1	15	7	1	15	1	3	7	6	9	12	7	6	11	1	0	1	10	0	4	2	12	7	1	7	9	0	2	1	0	3	1	1	7	7	7	7
Bmal	22	5	10	2	4	8	6	6	1	0	2	0	2	18	8	1	15	2	0	8	5	14	18	11	11	18	0	1	5	19	1	7	2	22	14	3	12	7	1	1	5	0	14	2	4	15	2	8	8
Gay	15	1	2	3	6	10	7	8	1	1	6	1	2	3	0	1	4	3	1	1	1	8	9	6	5	6	2	2	1	13	0	4	0	11	7	5	10	8	3	6	5	6	10	1	6	5	3	5	6
Efem	13	3	2	2	4	10	4	9	1	0	6	1	3	4	1	1	2	2	2	2	2	6	11	6	7	8	1	0	2	10	2	4	1	10	7	1	6	4	1	5	8	5	7	0	7	7	1	4	1
Gaze	42	7	5	7	22	26	10	22	5	0	6	1	7	14	8	3	10	2	0	5	9	26	36	20	16	31	2	3	4	32	2	9	2	33	28	7	26	21	5	5	16	5	21	5	10	21	4	9	21
Narr	57	5	8	9	21	34	21	24	4	4	8	3	12	18	9	7	22	4	3	6	9	37	38	15	16	38	4	3	8	39	2	17	6	49	26	6	26	24	2	9	10	4	21	6	14	25	4	13	19
Perf	83	3	14	19	25	58	19	50	17	8	20	4	20	14	14	6	14	18	7	9	15	32	57	25	39	41	0	0	7	50	11	17	14	44	58	9	53	38	3	18	6	0	21	17	21	21	1	9	11
Coll	186	19	34	44	63	117	69	85	29	13	27	6	31	52	43	15	50	19	18	25	26	111	131	93	91	118	3	7	26	143	9	41	12	140	120	33	117	93	13	48	27	12	64	23	53	58	15	31	53
Movie	5	0	0	2	2	5	1	2	0	0	1	0	1	0	2	0	0	0	1	0	1	2	1	2	2	3	0	2	1	3	1	1	0	3	4	1	2	3	1	2	0	0	2	1	0	2	0	0	1
Sat	22	3	3	6	5	15	11	11	1	0	1	3	10	6	0	2	5	1	1	4	4	11	13	5	10	9	5	1	1	18	5	8	2	20	15	3	15	8	3	6	6	6	8	4	8	6	2	5	7
[truncated: 40 more columns]
